# Supplementary material
Source: Springer Nature journal article supplement (https://www.springermedizin.de/resource/supplementary/12943_2009_458_MOESM1_ESM.pdf/9554310)
Supplement: MOESM1 [file 9554310]

## PCSK5

proprotein convertase subtilisin/kexin type 5

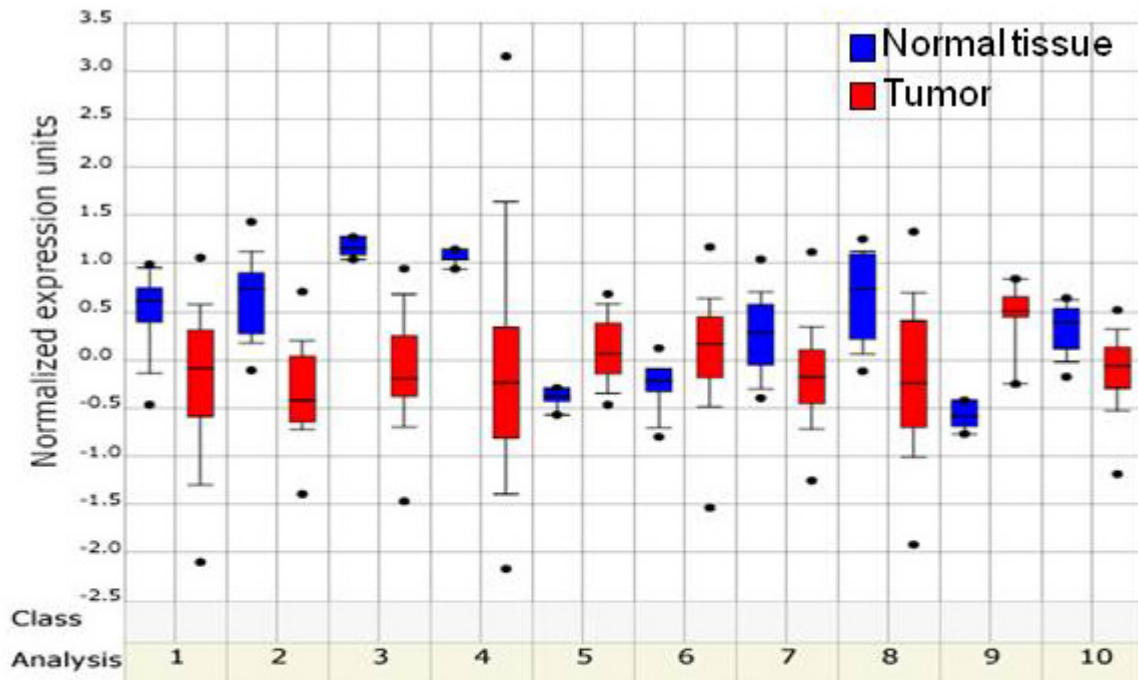

Box Plot - Description

1. Bladder Carcinoma
2. Cutaneous Melanoma
3. Ovarian Endometrioid Adenocarcinoma
4. B-Cell Acute Lymphoblastic Leukemia
5. Anaplastic Oligoastrocytoma, Anaplastic Oligodendroglioma
6. Glioblastoma Multiforme
7. Prostate Carcinoma
8. Head and Neck Cancer
9. Pancreatic Ductal Adenocarcinoma
10. Head and Neck Squamous Cell Carcinoma
